# Supplementary material for: A Multiplex Microsphere Immunoassay for Zika Virus Diagnosis
Source: PubMed Central journal article supplement (PMC5474433; doi:10.1016/j.ebiom.2017.01.008), 2017-01-10
Supplement: mmc1.pdf [file mmc1.pdf]

**Supplemental figure**

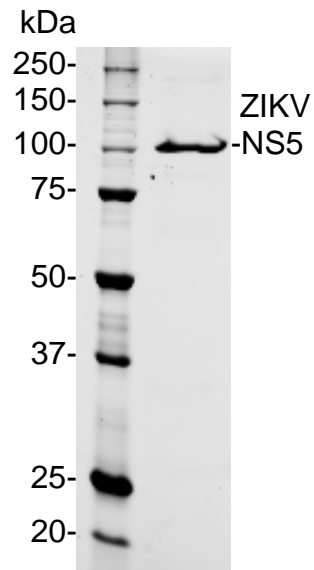

**Figure S1.** SDS-PAGE analysis of recombinant ZIKV NS5 protein. Full-length NS5 of ZIKV was expressed in an *E.coli* system, and purified through affinity followed by size-exclusion chromatography (see details in Materials and Methods). The recombinant protein was analyzed on a 12% Mini-PROTEAN® TGX Stain-Free™ Protein Gel (Bio-rad).

**Table S1.** Group specimens with neither ZIKV nor DENV infection defined by PRNT\*

| <b>ZIKV PRNT Cutoff 10</b>                         | <b>DENV PRNT Cutoff 10</b> | <b>ZIKV IgM-capture ELISA P/N 2 &amp; 3</b> |                | <b>ZIKV E Cutoff 1363</b> | <b>ZIKV NS1 Cutoff 284</b> | <b>ZIKV NS5 Cutoff 1905</b> | <b>DENV-1 NS1 Cutoff 746</b> | <b>DENV-2 NS1 Cutoff 549</b> | <b>DENV-3 NS1 Cutoff 339</b> | <b>DENV-4 NS1 Cutoff 655</b> |
|----------------------------------------------------|----------------------------|---------------------------------------------|----------------|---------------------------|----------------------------|-----------------------------|------------------------------|------------------------------|------------------------------|------------------------------|
| <10                                                | <10                        | 0.2                                         |                | 1189                      | 167                        | 573                         | 1200                         | 935                          | 100                          | 450                          |
| <10                                                | <10                        | 0.5                                         |                | 1415                      | 155                        | 308                         | 220                          | 259                          | 61                           | 96                           |
| <10                                                | <10                        | 0.9                                         |                | 195                       | 54                         | 1128                        | 87                           | 51                           | 230                          | 175                          |
| <10                                                | <10                        | 1.9                                         |                | 366                       | 91                         | 1900                        | 306                          | 216                          | 168                          | 136                          |
| <10                                                | <10                        | 1.9                                         |                | 7742                      | 4619                       | 4267                        | 127                          | 105                          | 113                          | 275                          |
| <10                                                | <10                        | 3.8                                         |                | 178                       | 69                         | 534                         | 235                          | 141                          | 113                          | 211                          |
| <10                                                | <10                        | 11.6                                        |                | 1001                      | 53                         | 211                         | 418                          | 509                          | 75                           | 125                          |
| <b>Positive sample number /total sample number</b> |                            | P/N >2:<br>2/7                              | P/N >3:<br>2/7 | 2/7                       | 1/7                        | 1/7                         | 1 <sup>#</sup> /7            |                              |                              |                              |

\*The table is sorted with increasing value of IgM-capture ELISA result. The cutoff values for each assay are indicated.

<sup>#</sup>Specimens with at least one serotype of DENV NS1-positive are considered as “positive.”

**Table S2.** Group II specimens with DENV only infection defined by PRNT\*

| <b>ZIKV PRNT Cutoff 10</b>                         | <b>DENV PRNT Cutoff 10</b> | <b>ZIKV IgM-capture ELISA Cutoff 2 &amp; 3</b> | <b>ZIKV E Cutoff 1363</b> | <b>ZIKA NS1 Cutoff 284</b> | <b>ZIKV NS5 Cutoff 1905</b> | <b>DENV-1 NS1 Cutoff 746</b> | <b>DENV-2 NS1 Cutoff 549</b> | <b>DENV-3 NS1 Cutoff 339</b> | <b>DENV-4 NS1 Cutoff 655</b> |
|----------------------------------------------------|----------------------------|------------------------------------------------|---------------------------|----------------------------|-----------------------------|------------------------------|------------------------------|------------------------------|------------------------------|
| <10                                                | 20                         | 0.19                                           | 9131                      | 234                        | 170                         | 5375                         | 1579                         | 3091                         | 1442                         |
| <10                                                | 40                         | 0.60                                           | 7145                      | 211                        | 331                         | 9101                         | 2831                         | 5415                         | 3740                         |
| <10                                                | 80                         | 1.5                                            | 11139                     | 2514                       | 249                         | 9145                         | 6658                         | 10609                        | 14941                        |
| <10                                                | 160                        | 1.5                                            | 9596                      | 1806                       | 177                         | 7486                         | 5198                         | 8241                         | 11867                        |
| <10                                                | 640                        | 1.5                                            | 5381                      | 46                         | 227                         | 5323                         | 860                          | 2235                         | 1352                         |
| <10                                                | 80                         | 1.6                                            | 8071                      | 67                         | 554                         | 6862                         | 510                          | 1765                         | 658                          |
| <10                                                | 40                         | 5.1                                            | 6017                      | 51                         | 1473                        | 98                           | 50                           | 99                           | 165                          |
| <10                                                | 160                        | 5.8                                            | 7756                      | 38                         | 968                         | 4259                         | 179                          | 582                          | 305                          |
| <10                                                | 40                         | 77                                             | 8703                      | 106                        | 1009                        | 8805                         | 1511                         | 3165                         | 1558                         |
| <b>Positive sample number /total sample number</b> |                            | P/N >2:<br>3/9                                 | P/N >3:<br>3/9            | 9/9                        | 2/9                         | 0/9                          | 8 <sup>#</sup> /9            |                              |                              |

\*The table is sorted with increasing value of IgM-capture ELISA result. The cutoff values for each assay are indicated.

<sup>#</sup>Specimens with at least one serotype of DENV NS1-positive are considered as “positive.”

**Table S3.** Group III specimens with ZIKV only infection defined by PRNT \*

| <b>ZIKV PRNT Cutoff 10</b> | <b>DENV PRNT Cutoff 10</b> | <b>ZIKV IgM-capture ELISA Cutoff 2 &amp; 3</b> | <b>ZIKV E Cutoff 1363</b> | <b>ZIKA NS1 Cutoff 284</b> | <b>ZIKV NS5 Cutoff 1905</b> | <b>DENV-1 NS1 Cutoff 746</b> | <b>DENV-2 NS1 Cutoff 549</b> | <b>DENV-3 NS1 Cutoff 339</b> | <b>DENV-4 NS1 Cutoff 655</b> |
|----------------------------|----------------------------|------------------------------------------------|---------------------------|----------------------------|-----------------------------|------------------------------|------------------------------|------------------------------|------------------------------|
| 80                         | <10                        | 0.6                                            | 9960                      | 5207                       | 2624                        | 1346                         | 1172                         | 454                          | 744                          |
| 320                        | <10                        | 0.99                                           | 10692                     | 6173                       | 1676                        | 409                          | 531                          | 660                          | 631                          |
| 2560                       | <10                        | 1.8                                            | 16318                     | 9407                       | 10423                       | 548                          | 737                          | 802                          | 492                          |
| 40                         | <10                        | 2.4                                            | 858                       | 617                        | 1401                        | 349                          | 272                          | 249                          | 374                          |
| 10                         | <10                        | 2.75                                           | 2185                      | 297                        | 1777                        | 795                          | 729                          | 189                          | 285                          |
| 80                         | <10                        | 3.04                                           | 800                       | 481                        | 227                         | 163                          | 213                          | 118                          | 252                          |
| 160                        | <10                        | 3.80                                           | 9088                      | 7010                       | 3298                        | 438                          | 588                          | 782                          | 459                          |
| 320                        | <10                        | 3.97                                           | 11272                     | 4849                       | 2129                        | 1556                         | 1268                         | 250                          | 838                          |
| 320                        | <10                        | 4                                              | 11358                     | 4933                       | 2179                        | 1503                         | 1212                         | 212                          | 735                          |
| 320                        | <10                        | 4.5                                            | 8592                      | 5500                       | 4362                        | 311                          | 455                          | 452                          | 220                          |
| 160                        | <10                        | 6.2                                            | 3896                      | 3152                       | 2524                        | 574                          | 477                          | 203                          | 371                          |
| 160                        | <10                        | 7.88                                           | 5782                      | 701                        | 574                         | 340                          | 260                          | 125                          | 217                          |
| 1280                       | <10                        | 7.9                                            | 3233                      | 5196                       | 5865                        | 231                          | 263                          | 315                          | 246                          |
| 1280                       | <10                        | 7.9                                            | 4777                      | 6771                       | 8260                        | 364                          | 417                          | 508                          | 381                          |
| 320                        | <10                        | 8.1                                            | 8842                      | 4811                       | 15599                       | 214                          | 349                          | 561                          | 276                          |
| 320                        | <10                        | 8.1                                            | 9768                      | 5001                       | 18463                       | 253                          | 405                          | 532                          | 294                          |
| 320                        | <10                        | 8.13                                           | 12377                     | 6550                       | 21510                       | 391                          | 644                          | 927                          | 422                          |
| 160                        | <10                        | 8.29                                           | 457                       | 540                        | 930                         | 464                          | 258                          | 204                          | 168                          |
| 1280                       | <10                        | 10.9                                           | 496                       | 1010                       | 3139                        | 102                          | 84                           | 74                           | 108                          |
| 160                        | <10                        | 13.5                                           | 12420                     | 7611                       | 1809                        | 141                          | 195                          | 218                          | 401                          |
| 160                        | <10                        | 13.5                                           | 14292                     | 8757                       | 2491                        | 180                          | 243                          | 265                          | 548                          |
| 160                        | <10                        | 13.7                                           | 7432                      | 6664                       | 2876                        | 90                           | 159                          | 337                          | 149                          |
| 40                         | <10                        | 17                                             | 536                       | 1554                       | 2612                        | 153                          | 202                          | 122                          | 153                          |
| 640                        | <10                        | 17.70                                          | 6381                      | 7713                       | 18520                       | 1095                         | 1082                         | 628                          | 419                          |
| 640                        | <10                        | 20.1                                           | 2474                      | 2312                       | 2038                        | 197                          | 205                          | 67                           | 82                           |
| 640                        | <10                        | 20.18                                          | 3703                      | 1566                       | 4269                        | 75                           | 69                           | 314                          | 54                           |

|                                                    |     |                 |                  |       |       |       |                     |     |     |  |
|----------------------------------------------------|-----|-----------------|------------------|-------|-------|-------|---------------------|-----|-----|--|
| 160                                                | <10 | 22              | 530              | 428   | 679   | 151   | 116                 | 110 | 119 |  |
| 160                                                | <10 | 22              | 999              | 5442  | 3802  | 217   | 234                 | 263 | 86  |  |
| 320                                                | <10 | 25              | 7905             | 6814  | 5828  | 244   | 350                 | 242 | 166 |  |
| 320                                                | <10 | 25.5            | 8518             | 6914  | 6650  | 261   | 378                 | 303 | 228 |  |
| 1280                                               | <10 | 27              | 8494             | 5334  | 3631  | 102   | 107                 | 103 | 274 |  |
| 1280                                               | <10 | 27.18           | 10443            | 6998  | 4530  | 157   | 163                 | 158 | 407 |  |
| 640                                                | <10 | 28              | 3488             | 11213 | 4269  | 290   | 452                 | 579 | 62  |  |
| 640                                                | <10 | 28.8            | 8741             | 7471  | 3820  | 278   | 492                 | 662 | 147 |  |
| 640                                                | <10 | 29.9            | 6212             | 4915  | 5969  | 193   | 221                 | 288 | 115 |  |
| 640                                                | <10 | 30              | 3998             | 3187  | 3867  | 133   | 141                 | 158 | 73  |  |
| 1280                                               | <10 | 32              | 11745            | 7674  | 4459  | 174   | 49                  | 242 | 250 |  |
| 1280                                               | <10 | 32.3            | 13259            | 8154  | 4726  | 227   | 309                 | 304 | 309 |  |
| 640                                                | <10 | 42.1            | 9721             | 7456  | 658   | 143   | 276                 | 230 | 139 |  |
| 2560                                               | <10 | 47.2            | 16346            | 4928  | 3714  | 149   | 158                 | 320 | 60  |  |
| 320                                                | <10 | 50.4            | 8250             | 7160  | 638   | 134   | 251                 | 215 | 122 |  |
| 320                                                | <10 | 65.6            | 3645             | 2785  | 1229  | 52    | 74                  | 77  | 79  |  |
| <b>Positive sample number /total sample number</b> |     | P/N>2:<br>39/42 | P/N >3:<br>37/42 | 35/42 | 42/42 | 31/42 | 15 <sup>#</sup> /42 |     |     |  |

\*The table is sorted with increasing value of IgM-capture ELISA result. The cutoff values for each assay are indicated.

<sup>#</sup>Specimens with at least one serotype of DENV NS1-positive are considered as “positive.”

**Table S4.** Group specimens with ZIKV and/or DENV infection(s) defined by PRNT\*

| <b>ZIKV PRNT Cutoff 10</b> | <b>DENV PRNT Cutoff 10</b> | <b>ZIKV IgM-capture ELISA Cutoff 2 &amp; 3</b> | <b>ZIKV E Cutoff 1363</b> | <b>ZIKV NS1 Cutoff 284</b> | <b>ZIKV NS5 Cutoff 1905</b> | <b>DENV-1 NS1 Cutoff 746</b> | <b>DENV-2 NS1 Cutoff 549</b> | <b>DENV-3 NS1 Cutoff 339</b> | <b>DENV-4 NS1 Cutoff 655</b> |
|----------------------------|----------------------------|------------------------------------------------|---------------------------|----------------------------|-----------------------------|------------------------------|------------------------------|------------------------------|------------------------------|
| 2560                       | 320                        | 0.3                                            | 12411                     | 3002                       | 6118                        | 7992                         | 5677                         | 11340                        | 10357                        |
| 10                         | 40                         | 0.40                                           | 7446                      | 285                        | 790                         | 7714                         | 2875                         | 5725                         | 4420                         |
| 320                        | 2560                       | 0.4                                            | 15916                     | 4164                       | 11951                       | 10070                        | 8345                         | 14047                        | 13683                        |
| 20                         | 1280                       | 0.41                                           | 18428                     | 802                        | 461                         | 7969                         | 5627                         | 10631                        | 9581                         |
| 80                         | 640                        | 0.45                                           | 17887                     | 2203                       | 665                         | 5073                         | 3700                         | 5778                         | 9545                         |
| 160                        | 640                        | 0.45                                           | 18357                     | 2550                       | 796                         | 5886                         | 4181                         | 6677                         | 10700                        |
| 20                         | 640                        | 0.45                                           | 17361                     | 874                        | 551                         | 9206                         | 6339                         | 11251                        | 11171                        |
| 10                         | 80                         | 0.49                                           | 16355                     | 1950                       | 570                         | 10920                        | 8275                         | 15354                        | 11740                        |
| 1280                       | 2560                       | 0.53                                           | 18809                     | 6682                       | 650                         | 16472                        | 10777                        | 18272                        | 19435                        |
| 10                         | 160                        | 0.53                                           | 8131                      | 844                        | 325                         | 5142                         | 3838                         | 7463                         | 6020                         |
| 1280                       | 2560                       | 0.56                                           | 20863                     | 6548                       | 602                         | 16500                        | 10369                        | 19309                        | 19308                        |
| 160                        | 2560                       | 0.62                                           | 17472                     | 3453                       | 2503                        | 12655                        | 2806                         | 11109                        | 16787                        |
| 160                        | 2560                       | 0.69                                           | 18220                     | 3461                       | 2384                        | 13241                        | 2871                         | 12265                        | 17857                        |
| 2560                       | 640                        | 0.8                                            | 18354                     | 8434                       | 2396                        | 382                          | 426                          | 556                          | 309                          |
| 640                        | 1280                       | 1.09                                           | 16382                     | 4065                       | 3303                        | 11394                        | 7116                         | 13885                        | 7695                         |
| 320                        | 2560                       | 1.3                                            | 17322                     | 4085                       | 875                         | 15507                        | 11175                        | 17637                        | 16700                        |
| 2560                       | 320                        | 1.41                                           | 19995                     | 6926                       | 8456                        | 12524                        | 11268                        | 17951                        | 16740                        |
| 640                        | 1280                       | 1.53                                           | 21501                     | 7952                       | 3037                        | 16148                        | 12733                        | 19792                        | 22445                        |
| 320                        | 160                        | 1.63                                           | 14009                     | 6104                       | 1374                        | 11801                        | 11004                        | 17719                        | 4475                         |
| 320                        | 2560                       | 1.7                                            | 19788                     | 8615                       | 3494                        | 16160                        | 13589                        | 19342                        | 20432                        |
| 160                        | 2560                       | 1.8                                            | 16928                     | 3607                       | 551                         | 14462                        | 10561                        | 17158                        | 15002                        |
| 1280                       | 1280                       | 1.81                                           | 17896                     | 7868                       | 2698                        | 14294                        | 11672                        | 17853                        | 21180                        |
| 320                        | 2560                       | 1.9                                            | 20374                     | 8309                       | 2755                        | 16466                        | 13975                        | 19997                        | 20689                        |
| 640                        | 2560                       | 2.1                                            | 21021                     | 12154                      | 15783                       | 18993                        | 14796                        | 21073                        | 22419                        |
| 640                        | 2560                       | 2.16                                           | 21035                     | 11444                      | 13536                       | 18240                        | 15675                        | 21260                        | 22412                        |
| 5160                       | 5120                       | 2.3                                            | 18554                     | 6707                       | 553                         | 12751                        | 10464                        | 17362                        | 20153                        |

|      |       |      |       |       |       |       |       |       |       |
|------|-------|------|-------|-------|-------|-------|-------|-------|-------|
| 5120 | 1280  | 2.3  | 19606 | 11677 | 11105 | 14953 | 11886 | 18231 | 21051 |
| 5120 | 1280  | 2.32 | 18697 | 9335  | 7705  | 12257 | 9981  | 16633 | 17776 |
| 640  | 1280  | 2.45 | 20559 | 10939 | 21381 | 14675 | 10696 | 18537 | 17415 |
| 2560 | 1280  | 2.5  | 19945 | 9641  | 13280 | 15589 | 13022 | 19484 | 15561 |
| 2560 | 1280  | 2.52 | 18959 | 8035  | 11647 | 14771 | 12827 | 19260 | 13601 |
| 320  | 40    | 2.57 | 9760  | 1309  | 386   | 5967  | 1610  | 2724  | 3719  |
| 160  | 40    | 2.59 | 10893 | 859   | 180   | 3100  | 914   | 1643  | 6687  |
| 160  | 40    | 2.72 | 13602 | 1082  | 205   | 4179  | 1260  | 2191  | 8609  |
| 320  | 40    | 2.99 | 10133 | 1442  | 417   | 6469  | 1696  | 3018  | 4257  |
| 320  | 5120  | 3.13 | 18591 | 7977  | 1050  | 11995 | 9617  | 15868 | 14587 |
| 160  | 320   | 3.53 | 19680 | 5587  | 1681  | 317   | 292   | 543   | 270   |
| 2560 | 2560  | 3.89 | 17268 | 4501  | 5464  | 13748 | 9869  | 17527 | 12169 |
| 5120 | 5120  | 3.99 | 21644 | 10859 | 21825 | 12761 | 9859  | 17755 | 20283 |
| 160  | 320   | 4.02 | 16822 | 6103  | 2070  | 14021 | 10298 | 17324 | 15517 |
| 640  | 1280  | 4.42 | 20593 | 5338  | 1739  | 12752 | 11158 | 18128 | 18042 |
| 1280 | 1280  | 4.43 | 19973 | 8594  | 11143 | 12763 | 11051 | 17739 | 16997 |
| 1280 | 320   | 4.79 | 19355 | 10636 | 9796  | 12751 | 10778 | 18003 | 18073 |
| 640  | 1280  | 4.88 | 16101 | 4858  | 776   | 13093 | 8198  | 14431 | 8430  |
| 2560 | 1280  | 5.01 | 20780 | 12080 | 17177 | 16920 | 13760 | 20359 | 17012 |
| 160  | 640   | 5.1  | 19275 | 6311  | 2744  | 14623 | 12984 | 19646 | 15016 |
| 160  | 640   | 5.34 | 16289 | 5747  | 2635  | 15009 | 11904 | 18826 | 16649 |
| 10   | 80    | 5.47 | 16794 | 1307  | 1328  | 389   | 200   | 346   | 281   |
| 1280 | 640   | 6.05 | 16809 | 6987  | 3429  | 13666 | 12416 | 18579 | 5716  |
| 1280 | 80    | 6.52 | 2111  | 3626  | 1100  | 209   | 289   | 243   | 291   |
| 320  | 160   | 7.04 | 19585 | 2905  | 3390  | 10849 | 5579  | 10368 | 11556 |
| 320  | 160   | 7.04 | 20334 | 3419  | 4461  | 11917 | 6275  | 12136 | 12769 |
| 320  | 80    | 7.32 | 19940 | 2687  | 2942  | 10583 | 5368  | 9833  | 10471 |
| 1280 | 10    | 7.49 | 13338 | 9654  | 6618  | 462   | 650   | 1220  | 700   |
| 1280 | 10    | 7.5  | 12624 | 9195  | 6717  | 341   | 478   | 986   | 514   |
| 2560 | 20480 | 8.3  | 20265 | 9171  | 2720  | 16781 | 12747 | 18712 | 20473 |

|       |       |       |       |       |       |       |       |       |       |
|-------|-------|-------|-------|-------|-------|-------|-------|-------|-------|
| 640   | 5120  | 8.5   | 20671 | 9098  | 7078  | 17100 | 14388 | 18608 | 22061 |
| 640   | 10240 | 9.04  | 21114 | 11671 | 11204 | 19358 | 15223 | 21543 | 22106 |
| 2560  | 320   | 10.16 | 18279 | 9899  | 7213  | 4524  | 3165  | 6948  | 1278  |
| 160   | 640   | 10.90 | 20183 | 7660  | 2078  | 2723  | 2628  | 5909  | 1384  |
| 320   | 640   | 10.99 | 14737 | 4336  | 15626 | 11828 | 9458  | 15927 | 6841  |
| 320   | 2560  | 11.1  | 20977 | 10041 | 2254  | 17295 | 13477 | 19549 | 10638 |
| 640   | 10240 | 11.4  | 20785 | 12169 | 11619 | 18884 | 15119 | 20667 | 21989 |
| 1280  | 2560  | 12    | 19968 | 8988  | 4259  | 17044 | 13238 | 19273 | 22230 |
| 1280  | 2560  | 12.54 | 20467 | 8901  | 3673  | 16470 | 13221 | 19341 | 22846 |
| 320   | 640   | 13    | 20546 | 6045  | 1818  | 15929 | 10974 | 18017 | 3192  |
| 640   | 1280  | 14    | 18531 | 5202  | 1896  | 11359 | 10329 | 16770 | 16440 |
| 640   | 640   | 14.64 | 20336 | 7675  | 1722  | 13716 | 12002 | 18849 | 20055 |
| 320   | 2560  | 15    | 21156 | 10463 | 3187  | 18463 | 14572 | 20246 | 22876 |
| 640   | 2560  | 16    | 20527 | 9862  | 5041  | 16141 | 12408 | 19080 | 21991 |
| 640   | 2560  | 16.29 | 19340 | 9066  | 5185  | 15029 | 11748 | 17407 | 20104 |
| 2560  | 20480 | 17    | 22317 | 6665  | 7447  | 15855 | 10725 | 17403 | 5509  |
| 2560  | 20480 | 17.23 | 17999 | 5738  | 7214  | 13635 | 8930  | 14737 | 5748  |
| 160   | 1280  | 17.41 | 19848 | 8375  | 6839  | 15679 | 13745 | 18998 | 22484 |
| 160   | 160   | 20.73 | 9391  | 6074  | 3340  | 356   | 679   | 566   | 309   |
| 10240 | 320   | 22    | 17752 | 7270  | 4264  | 62    | 156   | 388   | 96    |
| 1280  | 1280  | 22.2  | 20185 | 8584  | 16360 | 16030 | 12594 | 20100 | 10783 |
| 1280  | 20480 | 23    | 20703 | 10096 | 7859  | 18086 | 13614 | 18507 | 21267 |
| 320   | 20    | 23.6  | 9924  | 8081  | 9837  | 113   | 203   | 469   | 231   |
| 1280  | 5120  | 23.69 | 18836 | 8498  | 4119  | 15799 | 12910 | 18325 | 20333 |
| 320   | 10    | 25    | 1061  | 3108  | 2294  | 88    | 89    | 83    | 894   |
| 640   | 640   | 25.23 | 20066 | 9245  | 4529  | 17030 | 14304 | 20372 | 22431 |
| 2560  | 2560  | 26.13 | 21184 | 9524  | 2734  | 15615 | 13845 | 19053 | 22401 |
| 640   | 2560  | 27.9  | 19121 | 3787  | 3230  | 3522  | 3308  | 7426  | 3591  |
| 1280  | 10240 | 29.15 | 19711 | 10327 | 2437  | 16973 | 14262 | 18898 | 20341 |
| 1280  | 2560  | 29.9  | 21902 | 8590  | 3728  | 16006 | 13452 | 20836 | 22510 |



|                                                        |      |                  |                  |       |       |       |                     |       |       |
|--------------------------------------------------------|------|------------------|------------------|-------|-------|-------|---------------------|-------|-------|
| 640                                                    | 1280 | 30.53            | 18080            | 8675  | 17545 | 16414 | 13525               | 18677 | 14452 |
| 2560                                                   | 640  | 32               | 20207            | 6094  | 11566 | 10231 | 7930                | 14480 | 11206 |
| 640                                                    | 2560 | 33.4             | 20649            | 10126 | 6628  | 16806 | 13194               | 18759 | 22293 |
| 320                                                    | 160  | 35.88            | 4640             | 4268  | 2211  | 294   | 263                 | 175   | 169   |
| 320                                                    | 10   | 44.8             | 9837             | 7200  | 2590  | 284   | 253                 | 308   | 194   |
| 2560                                                   | 2560 | 46.1             | 19943            | 7114  | 7170  | 15766 | 11664               | 18454 | 8917  |
| 640                                                    | 640  | 47.93            | 2828             | 5437  | 7229  | 334   | 1185                | 1407  | 299   |
| 1280                                                   | 20   | 49.11            | 14063            | 6262  | 6839  | 359   | 291                 | 193   | 250   |
| 1280                                                   | 640  | 57               | 19062            | 6018  | 11756 | 12258 | 10914               | 17240 | 17024 |
| <b>Positive sample number<br/>/total sample number</b> |      | P/N >2:<br>72/95 | P/N >3:<br>60/95 | 94/95 | 95/95 | 69/95 | 91 <sup>#</sup> /95 |       |       |

\*The table is sorted with increasing value of IgM-capture ELISA result. The cutoff values for each assay are indicated.

<sup>#</sup>Specimens with at least one serotype of DENV NS1-positive are considered as “positive.”
